# Supplementary material
Source: publisher figshare collection journal article supplement (https://asha.figshare.com/articles/dataset/_/24309193)
Supplement: Supplementary file 1 [file 1]

**Supplemental Material S3.** Top 10 countries with average articles cited.

| <b>Country</b> | <b>Total Citations</b> | <b>Average Article Citations</b> |
|----------------|------------------------|----------------------------------|
| USA            | 1914                   | 47.85                            |
| ISRAEL         | 21                     | 21.00                            |
| CHINA          | 323                    | 20.19                            |
| KOREA          | 168                    | 16.80                            |
| UNITED KINGDOM | 16                     | 16.00                            |
| SLOVENIA       | 15                     | 15.00                            |
| GERMANY        | 71                     | 14.20                            |
| JAPAN          | 154                    | 12.83                            |
| AUSTRALIA      | 12                     | 12.00                            |
| SPAIN          | 17                     | 8.50                             |
