# Supplementary material
Source: publisher figshare collection journal article supplement (https://asha.figshare.com/articles/dataset/_/24309193)
Supplement: Supplementary file 2 [file 1]

**Supplemental Material S2.** Ranking of authors with > 4 publications and articles fractionalized.

| <b>Rank by<br/>Articles</b> | <b>Name of Author</b> | <b>Total Articles</b> | <b>Articles<br/>Fractionalized</b> |
|-----------------------------|-----------------------|-----------------------|------------------------------------|
| 1                           | SMITH RJH             | 5                     | 0.76                               |
| 2                           | HOLT JR               | 5                     | 0.74                               |
| 3                           | CHOI BY               | 5                     | 0.45                               |
| 4                           | KIM UK                | 5                     | 0.40                               |
| 5                           | CHIEN WW              | 4                     | 0.57                               |
| 6                           | ISGRIG K              | 4                     | 0.51                               |
| 7                           | HOSOYA M              | 4                     | 0.45                               |
| 8                           | KIM AR                | 4                     | 0.43                               |
| 8                           | PARK WY               | 4                     | 0.43                               |
| 10                          | JODELKA FM            | 4                     | 0.39                               |
| 10                          | HASTINGS ML           | 4                     | 0.39                               |
| 10                          | LENTZ JJ              | 4                     | 0.39                               |
| 13                          | TAO Y                 | 4                     | 0.38                               |
| 14                          | YANG SM               | 4                     | 0.35                               |
| 15                          | LEE KY                | 4                     | 0.34                               |
