# Supplementary material
Source: publisher figshare collection journal article supplement (https://asha.figshare.com/articles/dataset/_/24309193)
Supplement: Supplementary file 3 [file 1]

**Supplemental Material S1.** Search formulas and search time frames for each database.

| Database | Search formula                                                                                                                                                                                                                                                                                                                                                                                                                                                                                                                                                                                                                                                                                                                                                                                                                                                                                                                                                                                                                                                                                                                                                                                                                                                                                                                                                                                                    | Search time             |
|----------|-------------------------------------------------------------------------------------------------------------------------------------------------------------------------------------------------------------------------------------------------------------------------------------------------------------------------------------------------------------------------------------------------------------------------------------------------------------------------------------------------------------------------------------------------------------------------------------------------------------------------------------------------------------------------------------------------------------------------------------------------------------------------------------------------------------------------------------------------------------------------------------------------------------------------------------------------------------------------------------------------------------------------------------------------------------------------------------------------------------------------------------------------------------------------------------------------------------------------------------------------------------------------------------------------------------------------------------------------------------------------------------------------------------------|-------------------------|
| PubMed   | (("Hearing Loss*" [TIAB] OR "Hearing loss" [MeSH Terms] OR<br>"Hearing Loss, Bilateral" [MeSH Terms] OR "Hearing<br>Loss, Conductive" [MeSH Terms] OR "Hearing<br>Loss, Functional" [MeSH Terms] OR "Hearing<br>Loss, High-Frequency" [MeSH Terms] OR "Hearing<br>Loss, Mixed<br>Conductive-Sensorineural" [MeSH Terms] OR "Hearing<br>Loss, Sensorineural" [MeSH Terms] OR "Hearing<br>Loss, Central" [MeSH Terms] OR "Hearing<br>Loss, Noise-Induced" [MeSH Terms] OR "Hearing Loss,<br>Sudden" [MeSH Terms] OR "Hearing Loss, Unilateral" [MeSH<br>Terms] OR "Hearing Disorders" [TIAB] OR "Hearing<br>Disorders" [MeSH Terms] OR "Deafness*" [TIAB] OR<br>"Deafness" [MeSH Terms] OR "Hypoacusis" [TIAB] OR "Deaf<br>Mutism" [TIAB] OR "Deaf-Blind Disorder*" [TIAB] OR<br>"Deaf-Blind Disorders" [MeSH Terms] OR "Usher<br>Syndromes" [TIAB] OR "Usher Syndromes" [MeSH Terms] OR<br>"Wolfram Syndrome" [TIAB] OR "Hearing<br>Impairment" [TIAB] OR<br>"Presbycusis" [TIAB] OR "Presbycusis" [MeSH<br>Terms]) AND ("Gene*" [TIAB] OR "Genes" [MeSH Terms] OR<br>"DNA*" [TIAB] OR "Genetic*" [TIAB] OR "Genetics" [MeSH<br>Terms] OR "Cytogenetics" [TIAB] OR "Cytogenetics" [MeSH<br>Terms] OR "Genetic Research" [MeSH Terms] OR<br>"Genomics" [TIAB] OR "Genomics" [MeSH Terms] OR "Human<br>Genetic*" [TIAB] OR "Human Genetics" [MeSH Terms] OR<br>"Heredit*" [TIAB]) OR ("Genetic Hearing Loss" [TIAB]) | 1961.1.1-<br>2021.12.31 |

|                           |                                                                                                                                                                                                                                                                                                                                                                                                                                                                                              |                          |
|---------------------------|----------------------------------------------------------------------------------------------------------------------------------------------------------------------------------------------------------------------------------------------------------------------------------------------------------------------------------------------------------------------------------------------------------------------------------------------------------------------------------------------|--------------------------|
| WoS<br>Core<br>Collection | (TS=("Hearing Loss*" OR "Deafness*" OR "Hypoacusis" OR "Deaf Mutism" OR "Deaf-Blind Disorder" OR "Usher Syndromes" OR "Wolfram Syndrome" OR "Hearing Impairment" OR "Presbycusis") AND TS=("Genetic*" OR "Genomics" OR "Cytogenetics" OR "Heredit*")) OR TS=("Genetic Hearing Loss")                                                                                                                                                                                                         | 1961.1.1 -<br>2021.12.31 |
| Embase                    | ((('Hearing Loss*':ab OR 'Deafness*':ti,ab,kw OR 'Hypoacusis':ti ,ab,kw OR 'Deaf Mutism':ti,ab,kw OR 'Deaf-Blind Disorder':ti,ab,kw OR 'Usher Syndromes':ti,ab,kw OR 'Wolfram Syndrome':ti,ab,kw OR 'Hearing Impairment': ti,ab,kw OR 'Presbycusis':ti,ab,kw) AND ('Genetic*':ti,ab,kw OR 'Gene*':ti,ab,kw OR 'DNA*':ti,ab,kw OR 'Genomics':ti,ab,kw OR 'Cytogenetics':ti,ab,kw OR 'Heredit*':ti,ab,kw OR 'Human Genetics':ti,ab,kw) OR 'Genetic Hearing Loss':ti,ab,kw) AND [ embase]/lim ) | 1961.1.1 -<br>2021.12.31 |
